# Supplementary material for: The hierarchical nanowires array of iron phosphide integrated on a carbon fiber paper as an effective electrocatalyst for hydrogen generation
Source: Royal Society of Chemistry journal article supplement (doi:10.1039/c5ta08715e), 2015-12-22
Supplement: c5ta08715e1.pdf [file c5ta08715e1.pdf]

# The Hierarchical Nanowires Array of Iron Phosphide Integrated on Carbon Fiber Paper as an Effective Electrocatalyst for Hydrogen Generation

Cuncai Lv,<sup>a</sup> Zhen Peng,<sup>b</sup> Yaoxing Zhao,<sup>a</sup> Zhipeng Huang,<sup>\*a</sup> and Chi Zhang<sup>\*a</sup>

<sup>a</sup> Functional Molecular Materials Research Centre, Scientific Research Academy, Jiangsu University, Zhenjiang 212013, P. R. China.

<sup>b</sup> School of Materials Science and Engineering, Jiangsu University, Zhenjiang 212013, P. R. China.

\* Corresponding author: Zhipeng Huang, Chi Zhang;

E-mail: zphuang@ujs.edu.cn; chizhang@ujs.edu.cn; Phone/Fax: +86-511-88797815

## Electronic Supplementary Information

### Synthesis 1: Synthesis of CFP-CoP NA

In this experiment, cobalt chloride carbonate hydroxide ( $\text{Co}(\text{CO}_3)_{0.35}\text{Cl}_{0.20}(\text{OH})_{1.10}$ ) nanowires array was grown on CFP by hydrothermal reaction at 120 °C in a 50 mL Teflon-lined stainless-steel autoclave with a piece of cleaned CFP (2 cm x 5 cm) and 40 mL aqueous solution containing  $\text{CoCl}_2 \cdot 6\text{H}_2\text{O}$  (0.952 g) and  $\text{CO}(\text{NH}_2)_2$  (0.240 g) for 6 hours. Afterwards, the CFP- $\text{Co}(\text{CO}_3)_{0.35}\text{Cl}_{0.20}(\text{OH})_{1.10}$  nanowires array was converted to CFP-CoP nanowires array (CFP-CoP NA) by phosphidation using  $\text{NaH}_2\text{PO}_2$  (0.8 g) as phosphorus source in 350 °C tube furnace for 1 hour in  $\text{N}_2$  flow.

### Synthesis 2: Synthesis of CFP-FeP NA

In this experiment, iron oxide hydroxide ( $\text{FeO}(\text{OH})$ ) nanorods array was grown on CFP by hydrothermal reaction at 120 °C in a 50 mL Teflon-lined stainless-steel autoclave with a piece of cleaned CFP (2 cm x 5 cm) and 40 mL aqueous solution containing  $\text{FeCl}_3 \cdot 6\text{H}_2\text{O}$  (0.457 g) and  $\text{Na}_2\text{SO}_4$  (0.274 g) for 6 hours. To prepare the CFP-FeP nanorods array (CFP-FeP NA), the CFP- $\text{FeO}(\text{OH})$  nanorods array was annealed at 350 °C for 1 hour in tube furnace in  $\text{N}_2$  flow using  $\text{NaH}_2\text{PO}_2$  (0.8 g) as phosphorus source.

### Synthesis 3: Synthesis of FeP nanorods powder and CFP/FeP nanorods

In this experiment, the powder of iron oxide hydroxide (FeO(OH)) nanorods was prepared by hydrothermal reaction at 120 °C in a 50 mL Teflon-lined stainless-steel autoclave with 40 mL aqueous solution containing FeCl<sub>3</sub>•6H<sub>2</sub>O (0.457 g) and Na<sub>2</sub>SO<sub>4</sub> (0.274 g) for 6 hours. The brown product was isolated and washed by repeated centrifugation/ultrasonication with deionized water. Finally, the product was dried under vacuum at 60 °C. To prepare the powder of FeP nanorods, the FeO(OH) nanorods was annealed at 350 °C for 1 hour in tube furnace in N<sub>2</sub> flow using NaH<sub>2</sub>PO<sub>2</sub> (0.8 g) as phosphorus source.

To prepare the CFP/FeP nanorods, FeP nanorods (10 mg) and Nafion solution (5 wt%, 80 μL) were dispersed in 1 ml of water/ethanol (4/1, v/v) by ultrasonication (ultrasonic probe, 2 mm diameter, 130 W, 1 h) to form homogeneous ink. The dispersion (34 μL) was dropped onto a piece of cleaned CFP, which were sealed with tape with the exception of an exposed area 0.3 cm × 0.3 cm) and dried naturally. The CFP was cleaned by sonication sequentially in acetone, water and ethanol for 10 min each prior to the drop casting of the FeP nanorods.

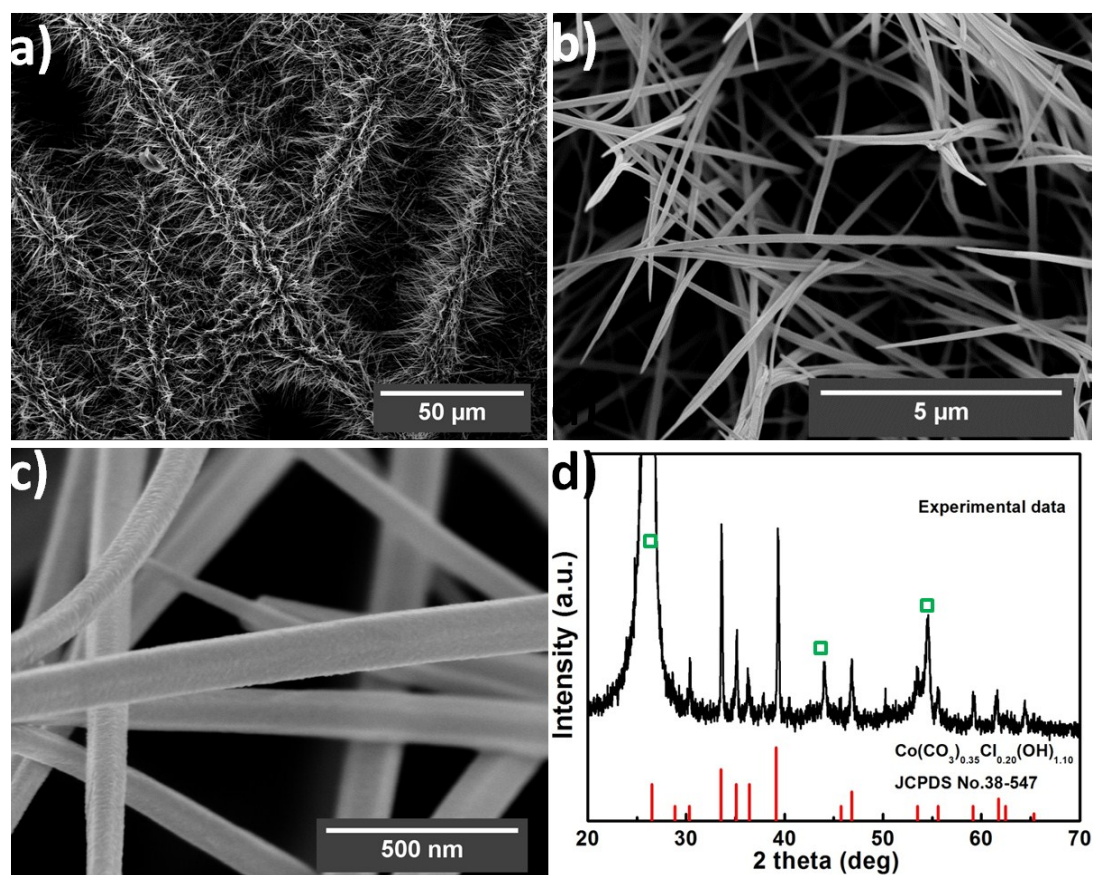

**Figure S1.** (a, b) Low- and (c) high-magnification SEM images, (d) XRD pattern of CFP-Co(CO<sub>3</sub>)<sub>0.35</sub>Cl<sub>0.20</sub>(OH)<sub>1.10</sub> NA (In the panel d, the peaks of CFP are marked by □).

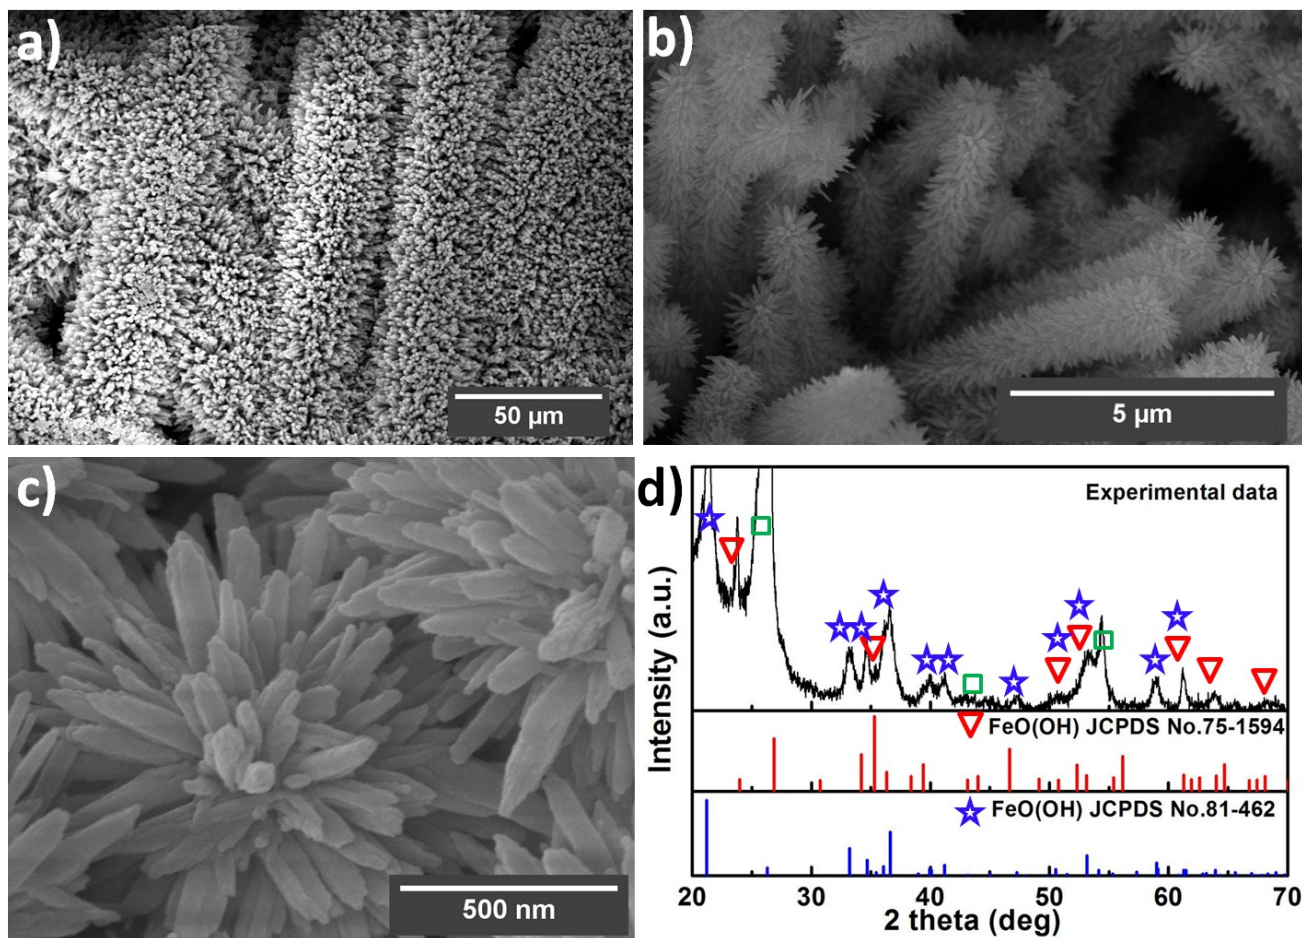

**Figure S2.** (a, b) Low- and (c) high-magnification SEM images, (d) XRD pattern of CFP- FeO(OH) HNA. (In the panel d, the peaks of CFP are marked by □.)

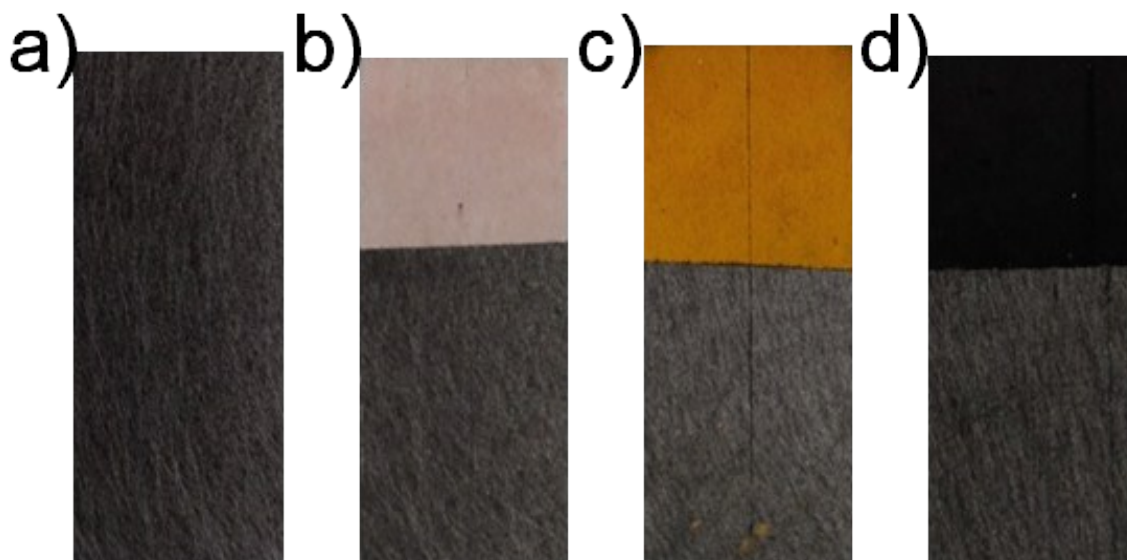

**Figure S3.** Optical photograph of the (a) Pristine CFP, (b) CFP- $\text{Co}(\text{CO}_3)_{0.35}\text{Cl}_{0.20}(\text{OH})_{1.10}$  NA, (c) CFP- $\text{FeO}(\text{OH})$  HNA, (d) CFP- $\text{FeP}$  HNA

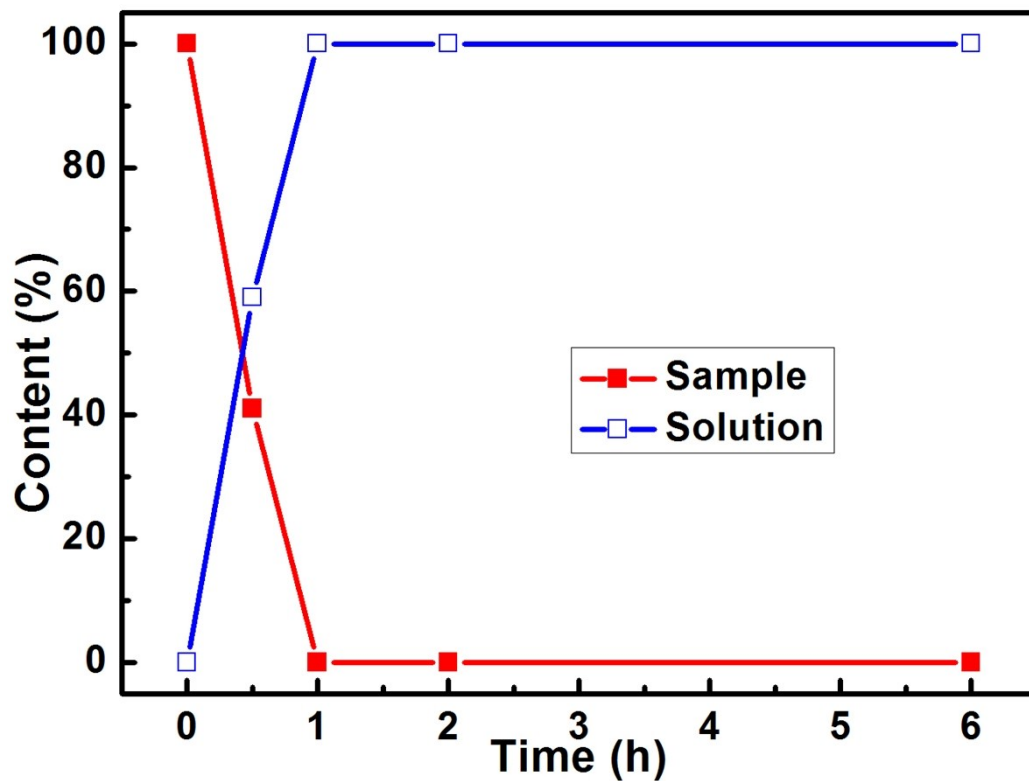

**Figure S4.** The ratio of the amount of cobalt in the CFP-FeO(OH) HNA to that in the solution after the hydrothermal growth of CFP-FeO(OH) HNA.

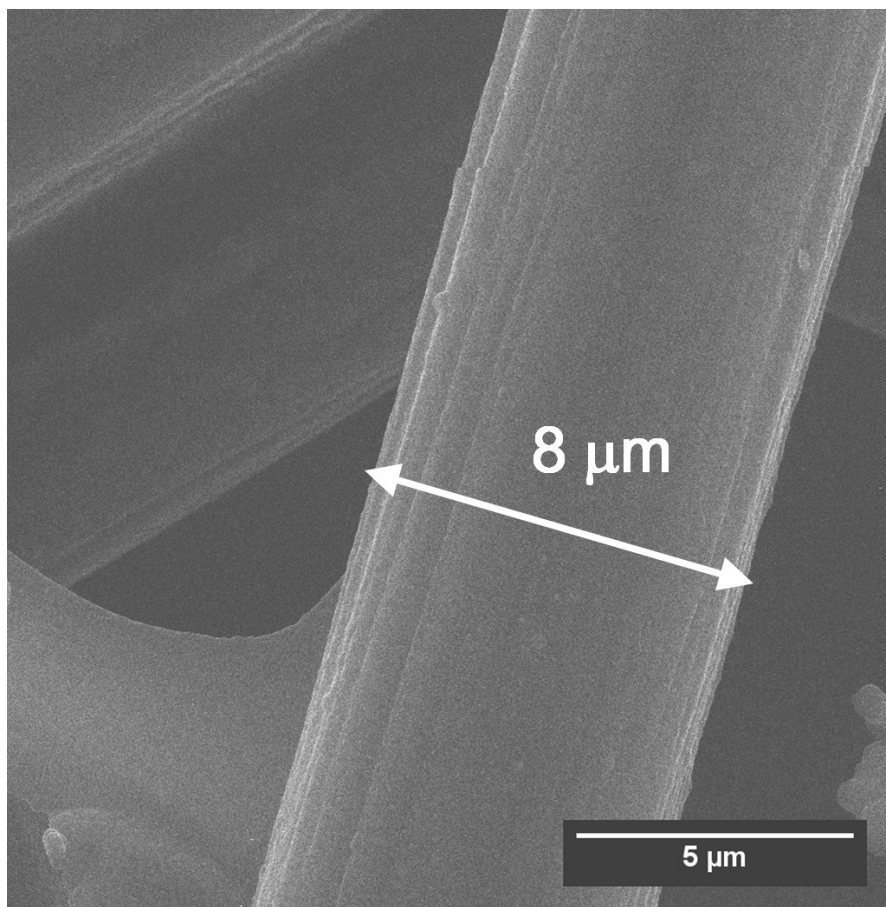

**Figure S5.** SEM image of the pristine CFP.

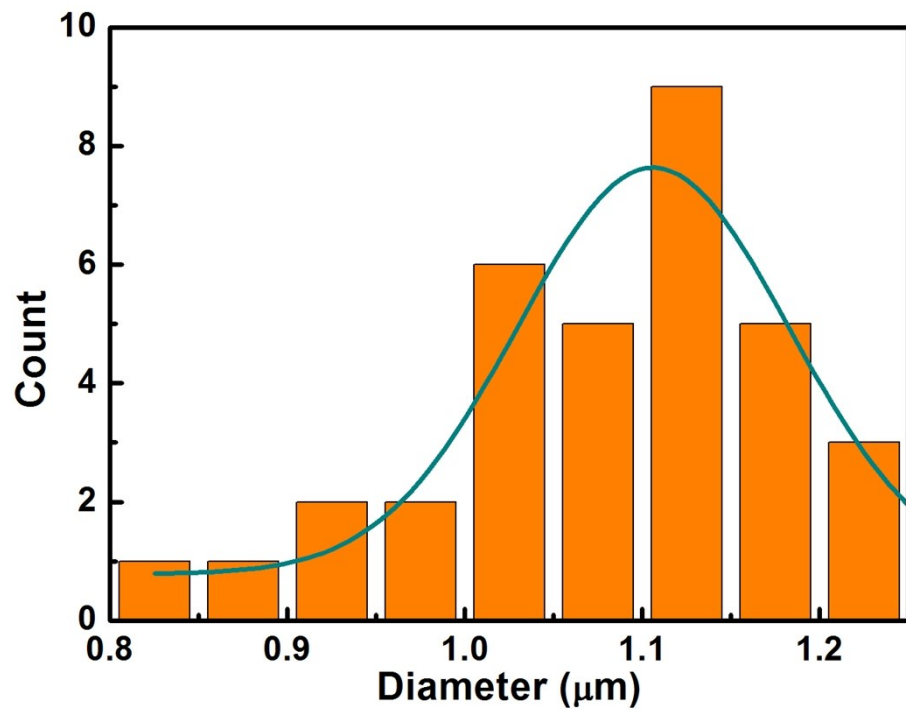

Figure S6. Diameter distribution of FeP HNA. The dark cyan line shows the Gaussian fitting of data.

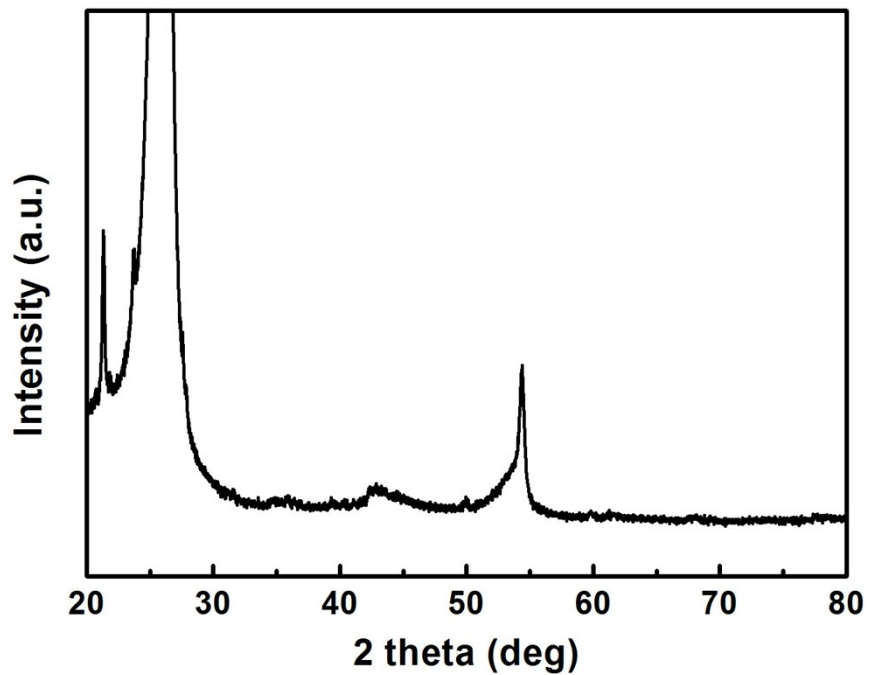

Figure S7. XRD pattern of pristine CFP

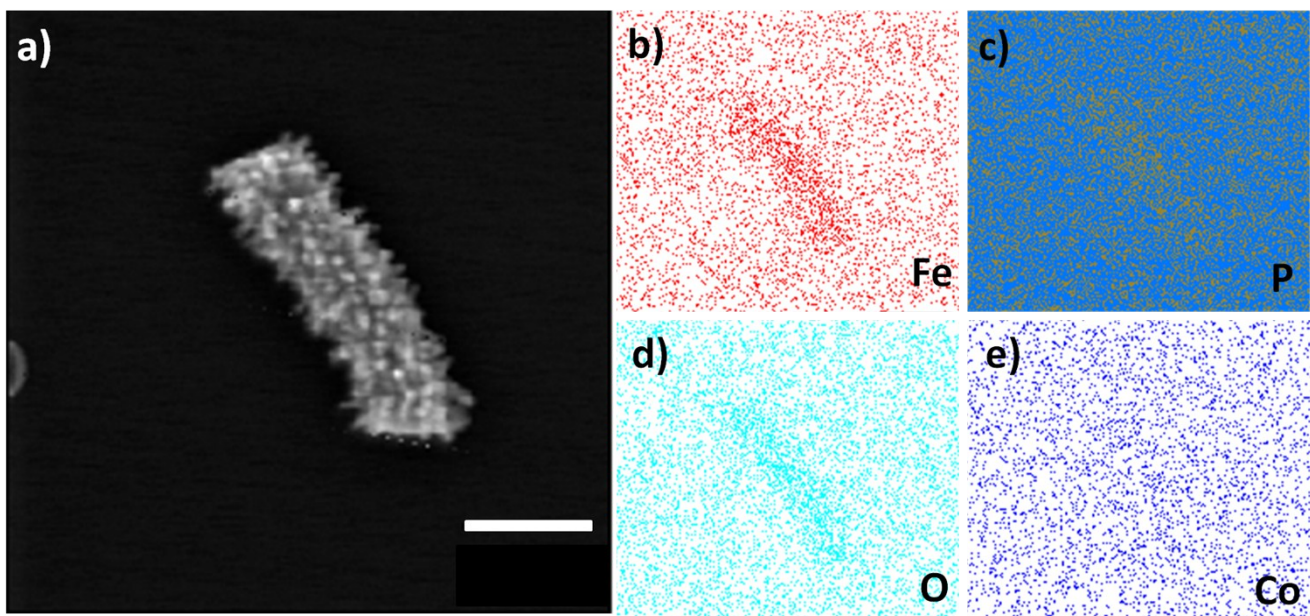

**Figure S8.** (a) SEM image recorded by a high-angle annular dark-field detector. The scale bar in (a) is 2  $\mu\text{m}$ . Elemental maps for the spatial distribution of (b) Fe, (c) P, (d) O and (e) Co obtained from the EDX elemental mapping of region indicated by the square in (a).

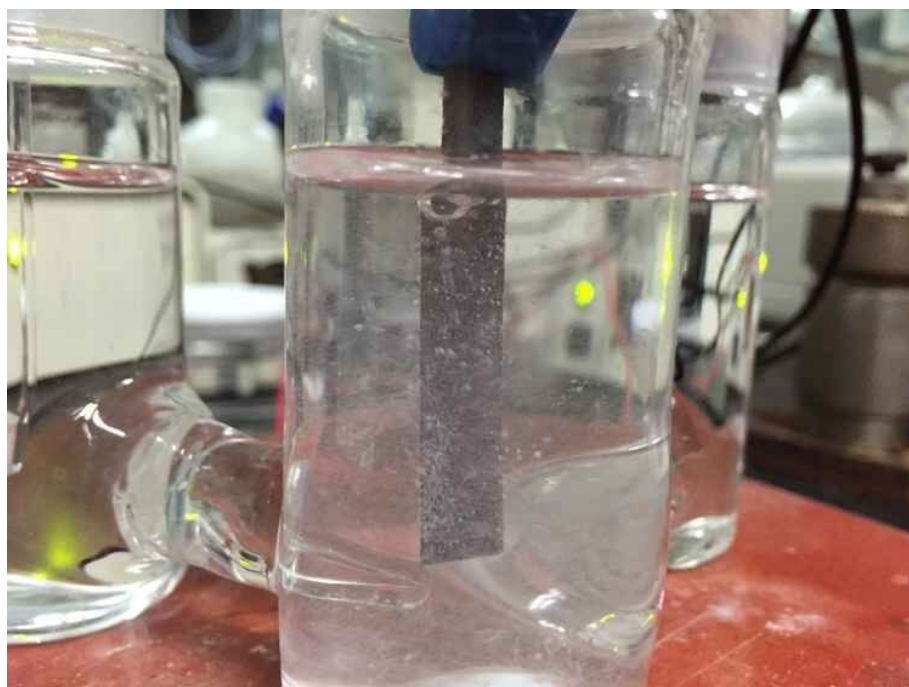

**Figure S9.** Optical photograph of the CFP-FeP HNA during the measurement.

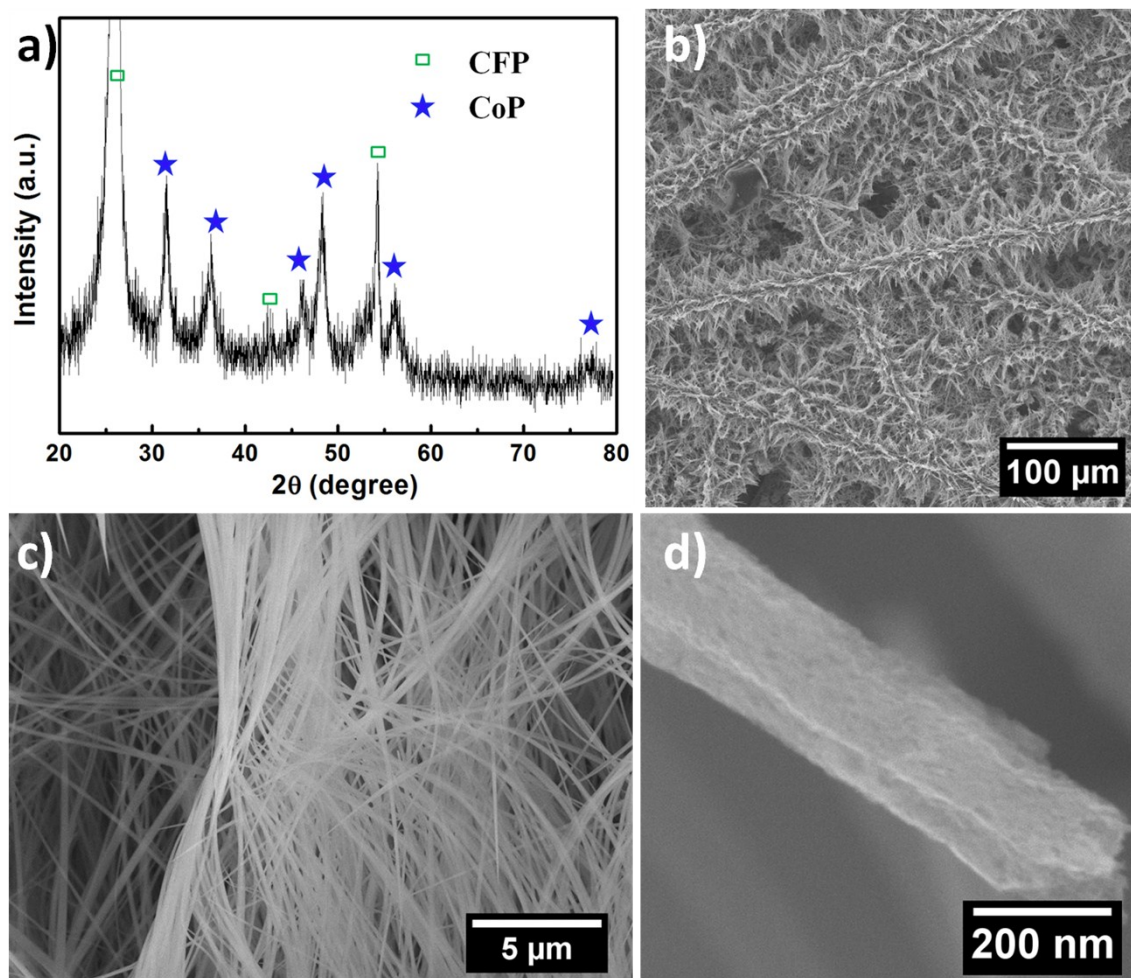

**Figure S10.** (a) XRD pattern, (b, c) Low- and (d) high-magnification SEM images of CFP-CoP NA.

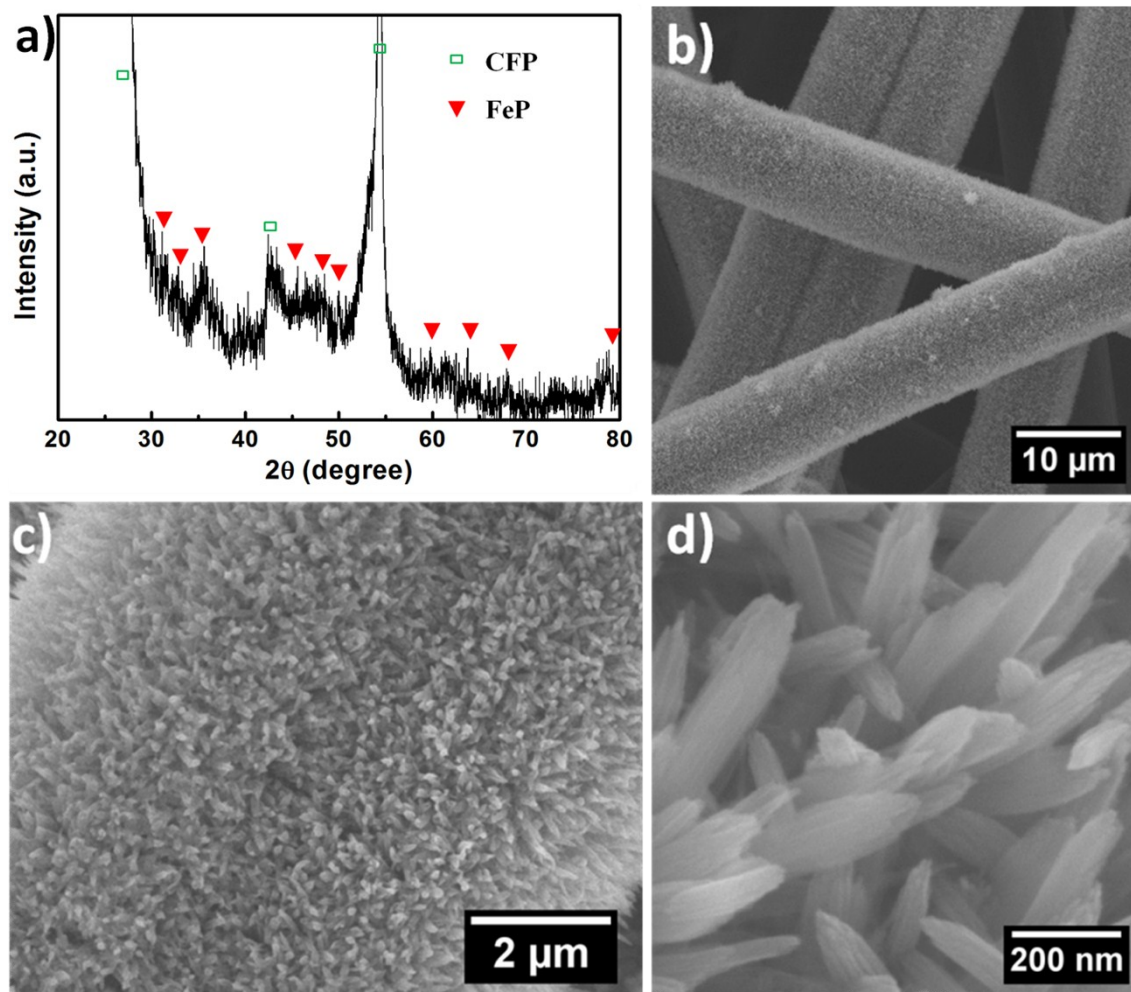

**Figure S11.** (a) XRD pattern, (b, c) Low- and (d) high-magnification SEM images of CFP-FeP NA.



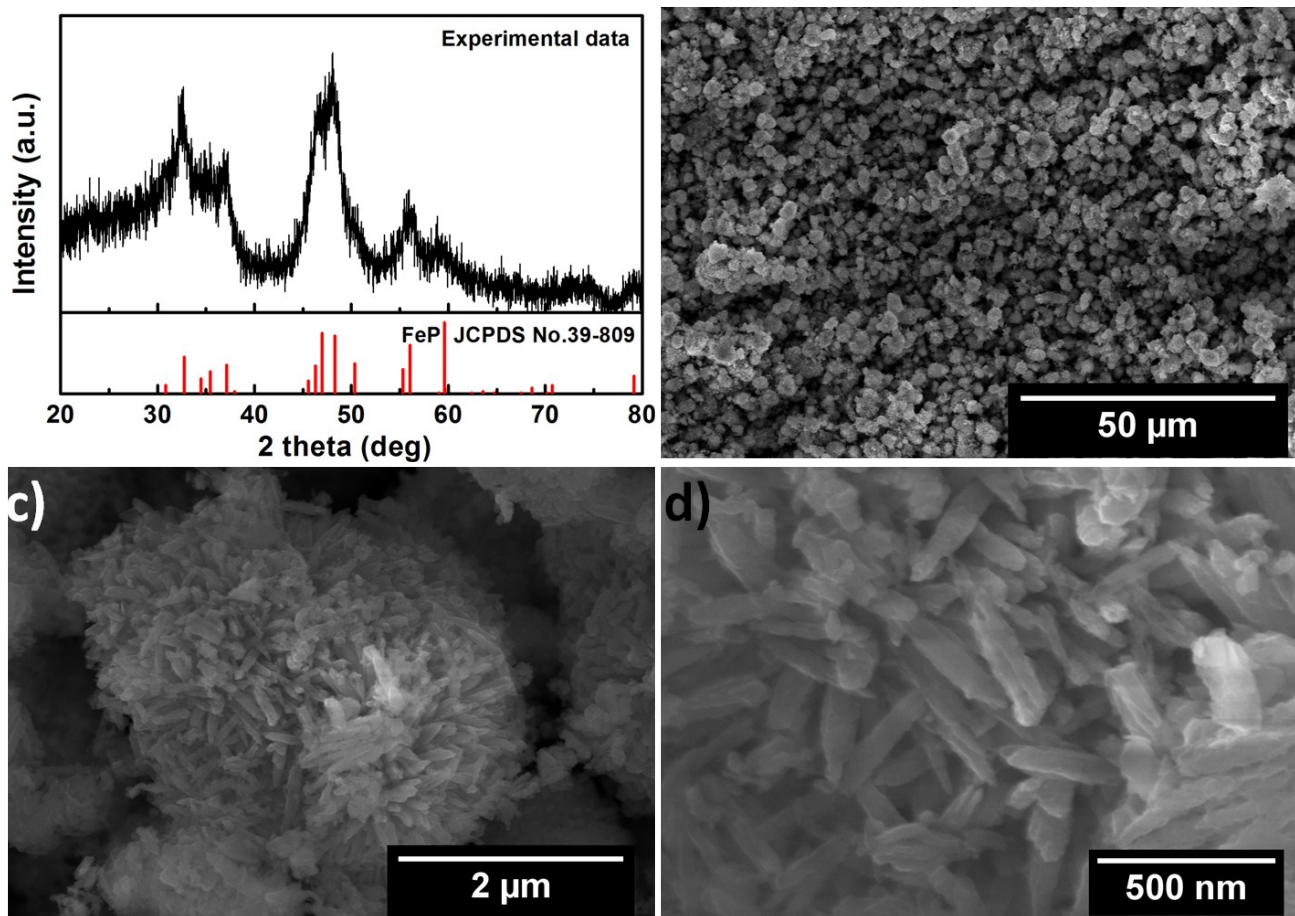

**Figure S12.** (a) XRD pattern, (b, c) Low- and (d) high-magnification SEM images of FeP nanorods.

**Table S1.** Summary of HER performance of representative catalysts.

| Catalyst                                                  | Substrate    | Mass density (mg/cm <sup>2</sup> ) | $\eta_{10}$ (mV) | $\eta_{20}$ (mV) | Tafel slope (mV/dec)                                                              | $J_0$ (mA/cm <sup>2</sup> ) | Electrolyte                          |
|-----------------------------------------------------------|--------------|------------------------------------|------------------|------------------|-----------------------------------------------------------------------------------|-----------------------------|--------------------------------------|
| Ni <sub>2</sub> P nanoparticle <sup>1</sup>               | Ti foil      | 1                                  | 117              | 130              | 46 <sub><math>\eta=25-125</math></sub><br>81 <sub><math>\eta=150-200</math></sub> | 3.3×10 <sup>-2</sup>        | 0.50M H <sub>2</sub> SO <sub>4</sub> |
| Ni <sub>2</sub> P nanoparticle <sup>2</sup>               | GCE          | 0.38                               |                  | 140              | 87                                                                                |                             | 0.50M H <sub>2</sub> SO <sub>4</sub> |
| Ni <sub>12</sub> P <sub>5</sub> nanoparticle <sup>3</sup> | GCE          | 3                                  |                  | 141              |                                                                                   |                             | 0.50M H <sub>2</sub> SO <sub>4</sub> |
| NiP <sub>2</sub> nanosheet on carbon cloth <sup>4</sup>   | Carbon cloth | 4.3                                |                  | 99               | 51                                                                                | 0.26                        | 0.50M H <sub>2</sub> SO <sub>4</sub> |
| CoP nanoparticle <sup>5</sup>                             | Ti foil      | 0.9                                |                  | 95               | 50                                                                                | 1.4×10 <sup>-1</sup>        | 0.50M H <sub>2</sub> SO <sub>4</sub> |
| CoP nanorod on carbon cloth <sup>6</sup>                  | carbon cloth | 0.92                               |                  | 100              | 51                                                                                | 2.8×10 <sup>-1</sup>        | 0.50M H <sub>2</sub> SO <sub>4</sub> |
| CoP particle on carbon nanotube <sup>7</sup>              | GCE          | 0.285                              | 122              |                  | 54                                                                                | 1.3×10 <sup>-1</sup>        | 0.50M H <sub>2</sub> SO <sub>4</sub> |

|                                                          |                        |       |      |         |                         |                      |                                                                                       |
|----------------------------------------------------------|------------------------|-------|------|---------|-------------------------|----------------------|---------------------------------------------------------------------------------------|
| Co <sub>2</sub> P nanorod <sup>8</sup>                   | GCE                    | 1     | 167  |         |                         |                      | 0.50M<br>H <sub>2</sub> SO <sub>4</sub>                                               |
| FeP nanoparticles <sup>9</sup>                           | Ti foil                | 1     | 50   | 61      | 37                      | 4.3×10 <sup>-1</sup> | 0.50M<br>H <sub>2</sub> SO <sub>4</sub>                                               |
| FePnanorods <sup>10</sup>                                | Ti foil                | 3.2   | 72   | 38      | 4.2×10 <sup>-1</sup>    |                      | 0.50M<br>H <sub>2</sub> SO <sub>4</sub>                                               |
| Porous FePnanosheet <sup>11</sup>                        | GCE                    |       | 325  | 67      |                         |                      |                                                                                       |
| MoP nanoparticle <sup>12</sup>                           | GCE                    | 0.36  | 125  | 54      | 8.6×10 <sup>-2</sup>    |                      | 0.50M<br>H <sub>2</sub> SO <sub>4</sub>                                               |
| MoP nanoparticle <sup>13</sup>                           | GCE                    |       | 160  | 54      | 3.4×10 <sup>-2</sup>    |                      | 0.50M<br>H <sub>2</sub> SO <sub>4</sub>                                               |
| Cu <sub>3</sub> P nanowires on copper foam <sup>14</sup> | copper foam            | 15.7  | 143  | 67      | 1.8×10 <sup>-1</sup>    |                      | 0.50M<br>H <sub>2</sub> SO <sub>4</sub>                                               |
| Ni-Mo nanopowder <sup>15</sup>                           | Ti foil                | 1     | 70   |         |                         |                      | 2 M<br>NaOH                                                                           |
| Ni-Mo nanopowder <sup>15</sup>                           | Ti foil                | 3     | 80   |         |                         |                      | 0.5 M<br>H <sub>2</sub> SO <sub>4</sub>                                               |
| Ni-Mo nanopowder <sup>15</sup>                           | Ti foil                | 1     | 79   | 107     |                         |                      | 1 M<br>NaOH                                                                           |
| Bulk Mo <sub>2</sub> C <sup>16</sup>                     | carbon paste electrode | 1.4   | 208  | 224     | 56 <sub>η=100-220</sub> | 1.3×10 <sup>-3</sup> | 0.50 M<br>H <sub>2</sub> SO <sub>4</sub>                                              |
| Bulk MoB <sup>16</sup>                                   | carbon paste electrode | 2.5   | 212  | 227     | 55 <sub>η=140-210</sub> | 1.4×10 <sup>-3</sup> | 0.50 M<br>H <sub>2</sub> SO <sub>4</sub>                                              |
| Mo <sub>2</sub> C/CNT <sup>17</sup>                      | carbon paper           | 2     | 149  | 55.2    |                         | 1.4×10 <sup>-2</sup> | 0.1 M<br>HClO <sub>4</sub>                                                            |
| Fe-WCN <sup>18</sup>                                     | RRDE                   | 0.4   | 220  | 47.1    |                         |                      | H <sub>2</sub> SO <sub>4</sub> (pH 1) +<br>Na <sub>2</sub> SO <sub>4</sub><br>(0.5 M) |
| Mo <sub>1</sub> Soy <sup>19</sup>                        | carbon paper           | 1.4   | 177  | 66.4    |                         | 1.3×10 <sup>-2</sup> | 0.1 M<br>HClO <sub>4</sub>                                                            |
| Mo <sub>2</sub> C <sup>20</sup>                          | GCE                    | 0.357 | 200  | 210-220 | 55.8-64.5               |                      | 0.50M<br>H <sub>2</sub> SO <sub>4</sub>                                               |
| Porous Mo <sub>2</sub> C nanowire <sup>21</sup>          | GCE                    | 0.21  | 150  | 53      |                         |                      | 0.50M<br>H <sub>2</sub> SO <sub>4</sub>                                               |
| Mo <sub>2</sub> C on Gr <sup>22</sup>                    | GCE                    | 0.285 | ~160 | 54      |                         |                      | 0.50M<br>H <sub>2</sub> SO <sub>4</sub>                                               |
| MoWC nanowire <sup>23</sup>                              | GCE                    | 1.28  | ~160 | 56      | 3.4 × 10 <sup>-3</sup>  |                      | 0.50M<br>H <sub>2</sub> SO <sub>4</sub>                                               |
| Mo <sub>1</sub> Soy-RGO <sup>19</sup>                    | carbon paper           | 0.47  | 109  | 62.7    | 3.7×10 <sup>-2</sup>    |                      | 0.1 M<br>HClO <sub>4</sub>                                                            |

|                                                                       |                   |                                           |       |     |                         |                       |                                      |
|-----------------------------------------------------------------------|-------------------|-------------------------------------------|-------|-----|-------------------------|-----------------------|--------------------------------------|
| Mo <sub>2</sub> C/C <sup>19</sup>                                     | carbon paper      | 2                                         | 311   |     | 87.6                    | 8.1×10 <sup>-3</sup>  | 0.1 M HClO <sub>4</sub>              |
| Co <sub>0.6</sub> Mo <sub>1.4</sub> N <sub>2</sub> <sup>24</sup>      | GCE               | 0.243                                     | 202   | 267 |                         | 2.3×10 <sup>-4</sup>  | 0.1M HClO <sub>4</sub>               |
| MoS <sub>3</sub> (33%)/MWCNT-NC <sup>25</sup>                         | silver electrode  | 0.255                                     | 206   | 226 | 40 <sub>η=135-174</sub> | 1.35×10 <sup>-4</sup> | 1 M H <sub>2</sub> SO <sub>4</sub>   |
| Core-shell MoO <sub>3</sub> -MoS <sub>2</sub> nanowires <sup>26</sup> | FTO               |                                           | 254   | 272 | 50-60 <sub>η=200</sub>  |                       | 0.5 M H <sub>2</sub> SO <sub>4</sub> |
| Defect-rich MoS <sub>2</sub> nanosheets <sup>27</sup>                 | GCE               | 0.285                                     | 190   | 214 | 50 <sub>η=120-180</sub> | 8.91×10 <sup>-3</sup> | 0.5 M H <sub>2</sub> SO <sub>4</sub> |
| MoS <sub>2</sub> @Au <sup>28</sup>                                    | Au electrode      | 0.00103                                   | 226   |     | 69                      | 9.3×10 <sup>-3</sup>  | 0.5 M H <sub>2</sub> SO <sub>4</sub> |
| amorphous MoS <sub>3</sub> -CV <sup>29</sup>                          | GCE               |                                           | 211   | 229 | 40 <sub>η=170-200</sub> | 1.3×10 <sup>-4</sup>  | 1 M H <sub>2</sub> SO <sub>4</sub>   |
| MoS <sub>2</sub> /RGO hierarchical <sup>30</sup>                      | GCE               | 0.285                                     | 154   | 176 | 41                      |                       | 0.5M H <sub>2</sub> SO <sub>4</sub>  |
| MoS <sub>2</sub> /MGF <sup>31</sup>                                   | GCE               | 0.21                                      | 146   | 159 | 42 <sub>η=90-120</sub>  |                       | 0.5 M H <sub>2</sub> SO <sub>4</sub> |
| MoS <sub>2</sub> /CNTs <sup>32</sup>                                  | glass carbon disk | 0.136                                     | 184   | 230 | 44.6                    |                       | 0.5 M H <sub>2</sub> SO <sub>4</sub> |
| Cu <sub>2</sub> MoS <sub>4</sub> <sup>33</sup>                        | GCE               | 0.0425                                    | 321   |     | 95                      |                       | pH0 H <sub>2</sub> SO <sub>4</sub>   |
| WS <sub>2</sub> /RGO <sup>34</sup>                                    | GCE               | 0.4                                       | 265   | 292 | 58                      |                       | 0.5M H <sub>2</sub> SO <sub>4</sub>  |
| WS <sub>2</sub> nanosheets <sup>35</sup>                              | GCE               | 0.0001-0.0002 or ca. one continuous layer | 233   | 275 | 55                      |                       | 0.5 M H <sub>2</sub> SO <sub>4</sub> |
| WS <sub>2</sub> nanosheets <sup>36</sup>                              | GCE               | 0.285                                     | 151   | 177 | 72                      | 2.5×10 <sup>-3</sup>  | 1 M H <sub>2</sub> SO <sub>4</sub>   |
| Cobalt-sulfide catalyst <sup>37</sup>                                 | FTO               |                                           | 165   | 227 | 93                      |                       | 1.0 M pH 7 PBS                       |
| NiWS <sub>x</sub> <sup>38</sup>                                       | FTO               |                                           | 373   | 430 | 96 <sub>η=120-150</sub> | 10 <sup>-2.66</sup>   | pH 7 PBS                             |
| CoWS <sub>x</sub> <sup>38</sup>                                       | FTO               |                                           | 271   | 311 | 78 <sub>η=120-150</sub> | 10 <sup>-2.25</sup>   | pH 7 PBS                             |
| CoMoS <sub>x</sub> <sup>38</sup>                                      | FTO               |                                           | 241   | 282 | 85 <sub>η=120-150</sub> | 10 <sup>-2.89</sup>   | pH 7 PBS                             |
| FeS <sub>2</sub> <sup>39</sup>                                        | GCE               |                                           | 192.6 |     | 62.5                    | 7×10 <sup>-4</sup>    | 0.5 M H <sub>2</sub> SO <sub>4</sub> |
| FeSe <sub>2</sub> <sup>39</sup>                                       | GCE               |                                           |       |     | 65.3                    | 3.5×10 <sup>-4</sup>  | 0.5 M H <sub>2</sub> SO <sub>4</sub> |
| Fe <sub>0.43</sub> Co <sub>0.57</sub> S <sub>2</sub> <sup>39</sup>    | GCE               |                                           | 264   |     | 55.9                    | 1.3×10 <sup>-3</sup>  | 0.5 M H <sub>2</sub> SO <sub>4</sub> |
| CoS <sub>2</sub> <sup>39</sup>                                        | GCE               |                                           | 232   |     | 44.6                    | 6.5×10 <sup>-5</sup>  | 0.5 M H <sub>2</sub> SO <sub>4</sub> |
| CoSe <sub>2</sub> <sup>39</sup>                                       | GCE               | 0.037                                     | 231   |     | 42.4                    | 6.5×10 <sup>-5</sup>  | 0.5 M H <sub>2</sub> SO <sub>4</sub> |
| Co <sub>0.56</sub> Ni <sub>0.44</sub> Se <sub>2</sub> <sup>39</sup>   | GCE               |                                           | 250   |     | 49.7                    | 6.3×10 <sup>-5</sup>  | 0.5 M                                |

|                                                                    |                 |     |       |      |                      |  |                                         |
|--------------------------------------------------------------------|-----------------|-----|-------|------|----------------------|--|-----------------------------------------|
|                                                                    |                 |     |       |      |                      |  | H <sub>2</sub> SO <sub>4</sub>          |
| Co <sub>0.32</sub> Ni <sub>0.68</sub> S <sub>2</sub> <sup>39</sup> | GCE             |     |       | 66.8 | 3.0×10 <sup>-4</sup> |  | 0.5 M<br>H <sub>2</sub> SO <sub>4</sub> |
| NiS <sub>2</sub> <sup>39</sup>                                     | GCE             |     |       | 41.6 | 1.4×10 <sup>-4</sup> |  | 0.5 M<br>H <sub>2</sub> SO <sub>4</sub> |
| NiSe <sub>2</sub> <sup>39</sup>                                    | GCE             | 250 |       | 56.9 | 5.7×10 <sup>-4</sup> |  | 0.5 M<br>H <sub>2</sub> SO <sub>4</sub> |
| Ni <sub>5</sub> P <sub>4</sub> /Ni foil <sup>40</sup>              | Ni foil         | 100 | 140   | 40   |                      |  | 0.5 M<br>H <sub>2</sub> SO <sub>4</sub> |
| FeP/CC <sup>41</sup>                                               | Carbon<br>Cloth |     | 34 43 | 29.2 |                      |  | 0.5 M<br>H <sub>2</sub> SO <sub>4</sub> |

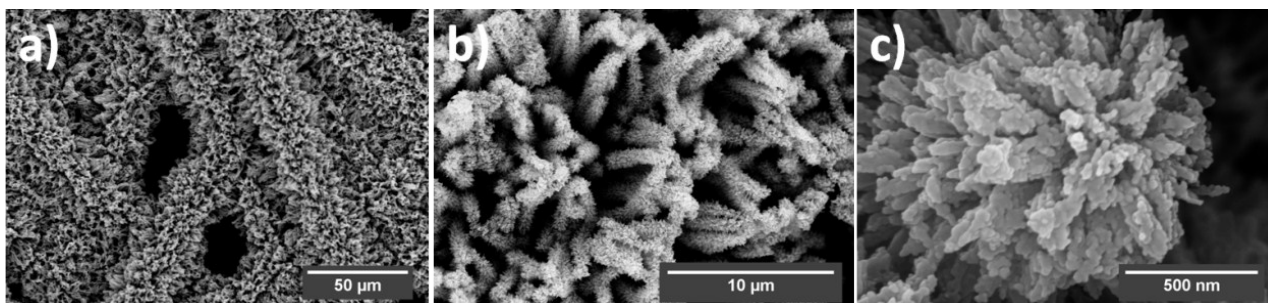

**Figure S13.** (a, b) Low- and (c) high-magnification SEM images of CFP- FeP HNA after the electrochemical measurement.

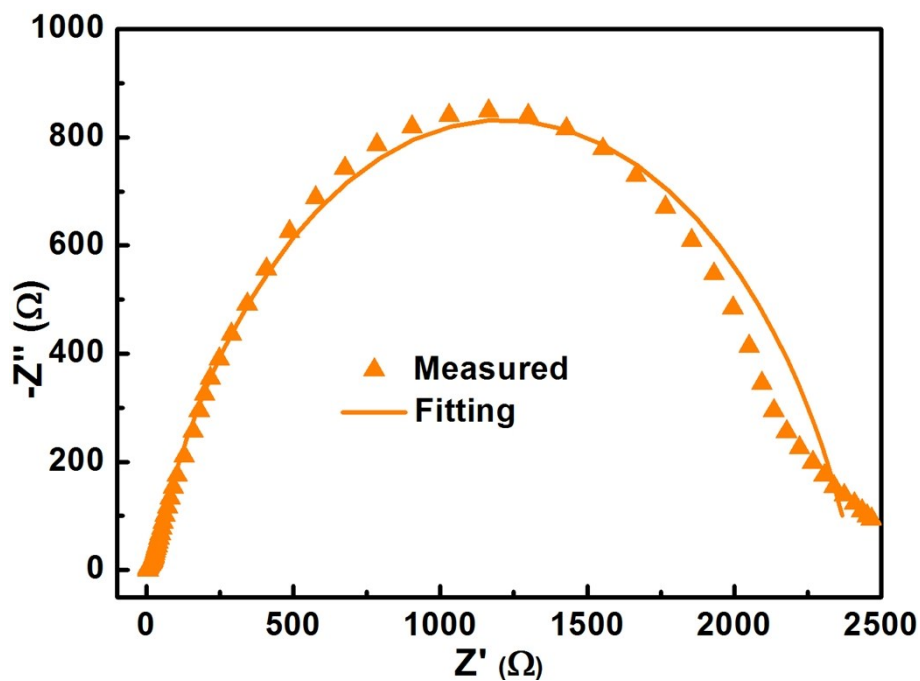

**Figure S14.** Nyquist plots of EIS spectra measured of CFP/FeP nanorods.

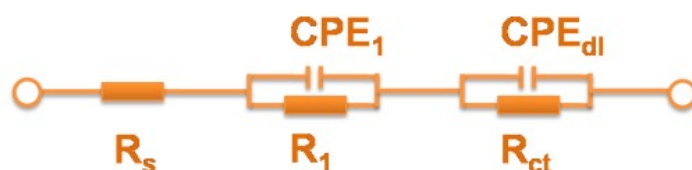

**Figure S15.** Equivalent circuit used to fit the EIS data.  $R_s$  is the overall series resistance,  $CPE_1$  and  $R_1$  are the constant phase element and resistance describing electron transport at substrate/catalyst interface, respectively,  $CPE_{dl}$  is the constant phase element of the catalyst/electrolyte interface, and  $R_{ct}$  is the charge transfer resistance at catalyst/electrolyte interface.

**Table S2.** The fitting results of EIS spectra

| Sample           | $R_s$<br>( $\Omega$ ) | $Q_{ct}$<br>( $F\ cm^{-2}\ S^{n-1}$ ) | $N_{ct}$ | $R_{ct}$<br>( $\Omega$ ) | $Q_1$<br>( $F\ cm^{-2}\ S^{n-1}$ ) | $n_1$  | $R_1$<br>( $\Omega$ ) |
|------------------|-----------------------|---------------------------------------|----------|--------------------------|------------------------------------|--------|-----------------------|
| CFP- FeP HNA     | 1.909                 | 5.802e-6                              | 0.7708   | 12.05                    | 0.04222                            | 0.7398 | 11.01                 |
| CFP-CoP NA       | 1.816                 | 9.502e-3                              | 0.7458   | 29.95                    | 1.5e-5                             | 0.6844 | 11.84                 |
| CFP- FeP NA      | 2.139                 | 1.768e-5                              | 0.6919   | 64.86                    | 3.427e-3                           | 0.8063 | 10.18                 |
| CFP/FeP nanorods | 5.191                 | 1.658e-4                              | 0.7738   | 2392                     | 8.61e-6                            | 1      | 12.09                 |

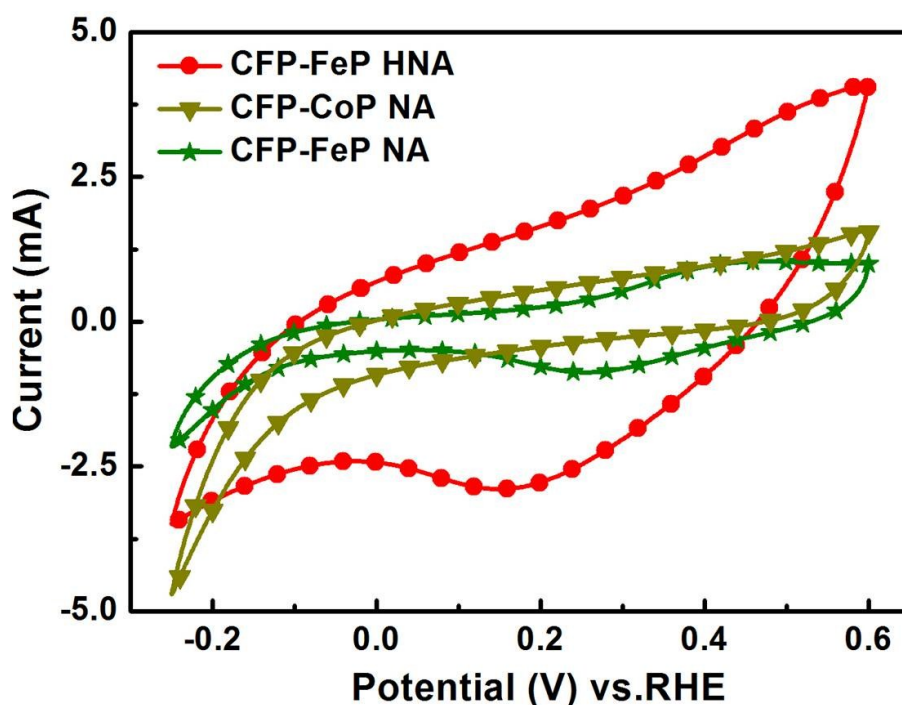

**Figure S16.** The CVs in the region of  $-0.2$  to  $0.6$  V vs RHE for CFP- FeP HNA, CFP-CoP NA, and CFP-FeP NA at pH 7 (scan rate:  $50\ mV\ s^{-1}$ ).

## References

1. E. J. Popczun, J. R. McKone, C. G. Read, A. J. Biacchi, A. M. Wiltrout, N. S. Lewis and R. E. Schaak, *J. Am. Chem. Soc.*, 2013, **135**, 9267-9270.
2. L. G. Feng, H. Vrubel, M. Bensimon and X. L. Hu, *Phys. Chem. Chem. Phys.*, 2014, **16**, 5917-5921.
3. Z. P. Huang, Z. B. Chen, Z. Z. Chen, C. C. Lv, H. Meng and C. Zhang, *Acs Nano*, 2014, **8**, 8121-8129.
4. M. Gong, W. Zhou, M. Tsai, J. Zhou, M. Guan, M. Lin, B. Zhang, Y. Hu, D. Wang, J. Yang, S. J. Pennycook, B.-J. Hwang and D. Hongjie, *Nat. Commun.*, 2014, **5**, 4695.
5. E. J. Popczun, C. G. Read, C. W. Roske, N. S. Lewis and R. E. Schaak, *Angew. Chem. Int. Ed.*, 2014, **53**, 5427-5430.
6. J. Q. Tian, Q. Liu, A. M. Asiri and X. P. Sun, *J. Am. Chem. Soc.*, 2014, **136**, 7587-7590.
7. Q. Liu, J. Q. Tian, W. Cui, P. Jiang, N. Y. Cheng, A. M. Asiri and X. P. Sun, *Angew. Chem. Int. Ed.*, 2014, **53**, 6710-6714.
8. Z. P. Huang, Z. Z. Chen, Z. B. Chen, C. C. Lv, M. G. Humphrey and C. Zhang, *Nano Energy*, 2014, **9**, 373-382.
9. J. F. Callejas, J. M. McEnaney, C. G. Read, J. C. Crompton, A. J. Biacchi, E. J. Popczun, T. R. Gordon, N. S. Lewis and R. E. Schaak, *ACS Nano*, 2014, **8**, 11101-11107.
10. P. Jiang, Q. Liu, Y. H. Liang, J. Q. Tian, A. M. Asiri and X. P. Sun, *Angew. Chem. Int. Ed.*, 2014, **53**, 12855-12859.
11. Y. Xu, R. Wu, J. F. Zhang, Y. M. Shi and B. Zhang, *Chem. Commun.*, 2013, **49**, 3.
12. Z. C. Xing, Q. Liu, A. M. Asiri and X. P. Sun, *Adv. Mater.*, 2014, **26**, 5702-5707.
13. P. Xiao, M. A. Sk, L. Thia, X. M. Ge, R. J. Lim, J. Y. Wang, K. H. Lim and X. Wang, *Energ. Environ. Sci.*, 2014, **7**, 2624-2629.
14. J. Q. Tian, Q. Liu, N. Y. Cheng, A. M. Asiri and X. P. Sun, *Angew. Chem. Int. Ed.*, 2014, **53**, 9577-9581.
15. J. R. McKone, B. F. Sadtler, C. A. Werlang, N. S. Lewis and H. B. Gray, *ACS Catal.*, 2013, **3**, 166-169.
16. H. Vrubel and X. L. Hu, *Angew. Chem. Int. Ed.*, 2012, **51**, 12703-12706.
17. W. F. Chen, C. H. Wang, K. Sasaki, N. Marinkovic, W. Xu, J. T. Muckerman, Y. Zhu and R. R. Adzic, *Energ. Environ. Sci.*, 2013, **6**, 943-951.
18. Y. Zhao, K. Kamiya, K. Hashimoto and S. Nakanishi, *Angew. Chem. Int. Ed.*, 2013, **52**, 1-5.
19. W. F. Chen, S. Iyer, S. Iyer, K. Sasaki, C. H. Wang, Y. M. Zhu, J. T. Muckerman and E. Fujita, *Energ. Environ. Sci.*, 2013, **6**, 1818-1826.
20. C. J. Ge, P. Jiang, W. Cui, Z. H. Pu, Z. C. Xing, A. M. Asiri, A. Y. Obaid, X. P. Sun and J. Tian, *Electrochim. Acta*, 2014, **134**, 182-186.
21. L. Liao, S. N. Wang, J. J. Xiao, X. J. Bian, Y. H. Zhang, M. D. Scanlon, X. L. Hu, Y. Tang, B. H. Liu and H. H. Girault, *Energ. Environ. Sci.*, 2014, **7**, 387-392.
22. L. F. Pan, Y. H. Li, S. Yang, P. F. Liu, M. Q. Yu and H. G. Yang, *Chem. commun.*, 2014, **50**, 13135-13137.
23. P. Xiao, X. M. Ge, H. B. Wang, Z. L. Liu, A. Fisher and X. Wang, *Adv. Funct. Mater.*, 2015, **25**, 1520-1526.
24. B. F. Cao, C. M. Veith, J. C. Neuefeind, R. R. Adzic and P. G. Khalifah, *J. Am. Chem. Soc.*, 2013, **135**, 19186-19192.

25. T. W. Lin, C. J. Liu and J. Y. Lin, *Appl. Catal. B- Environ.*, 2013, **134-135**, 75-82.
26. Z. Chen, D. Cummins, B. N. Reinecke, E. Clark, M. K. Sunkara and T. F. Jaramillo, *Nano Lett.*, 2011, **11**, 4168-4175.
27. J. Xie, H. Zhang, S. Li, R. Wang, X. Sun, M. Zhou, J. Zhou, X. W. Lou and Y. Xie, *Adv. Mater.*, 2013, **25**, 5807-5813.
28. T. Y. Wang, L. Liu, Z. W. Zhu, P. Papakonstantinou, J. B. Hu and M. Li, *Energ. Environ. Sci.*, 2013, **6**, 625-633.
29. D. Merki, S. Fierro, H. Vrubel and X. L. Hu, *Chem. Sci.*, 2011, **2**, 1262-1267.
30. Y. Li, H. Wang, L. Xie, Y. Liang, G. Hong and H. Dai, *J. Am. Chem. Soc.*, 2011, **133**, 7296-7299.
31. L. Liao, J. Zhu, X. J. Bian, L. N. Zhu, M. D. Scanlon, H. H. Girault and B. H. Liu, *Adv. Funct. Mater.*, 2013, **23**, 5326-5333.
32. Y. Yan, X. Ge, Z. Liu, J. Y. Wang, J. M. Lee and X. Wang, *Nanoscale*, 2013, **5**, 7768-7771.
33. P. D. Tran, M. Nguyen, S. S. Pramana, A. Bhattacharjee, S. Y. Chiam, J. Fize, M. J. Field, V. Artero, L. H. Wong, J. Loo and J. Barber, *Energ. Environ. Sci.*, 2012, **5**, 8912-8916.
34. J. Yang, D. Voiry, S. J. Ahn, D. Kang, A. Y. Kim, M. Chhowalla and H. S. Shin, *Angew. Chem. Int. Ed.*, 2013, **52**, 13751-13754.
35. D. Voiry, H. Yamaguchi, J. Li, R. Silva, D. C. Alves, T. Fujita, M. Chen, T. Asefa, V. B. Shenoy, G. Eda and M. Chhowalla, *Nat. Mater.*, 2013, **12**, 850-855.
36. Z. Z. Wu, B. Z. Fang, B. Arman, A. K. Sun, D. P. Wilkinson and D. Z. Wang, *Appl. Catal. B- Environ.*, 2012, **125**, 59-66.
37. Y. Sun, C. Liu, D. C. Grauer, J. Yano, J. R. Long, P. Yang and C. J. Chang, *J. Am. Chem. Soc.*, 2013, **135**, 17699-17702.
38. P. D. Tran, S. Y. Chiam, P. P. Boix, Y. Ren, S. S. Pramana, J. Fize, V. Artero and J. Barber, *Energ. Environ. Sci.*, 2013, **6**, 2452-2459.
39. D. S. Kong, J. J. Cha, H. T. Wang, H. R. Lee and Y. Cui, *Energ. Environ. Sci.*, 2013, **6**, 3553-3558.
40. M. Ledendecker, S. K. Calderón, C. Papp, H. P. Steinrück, M. Antonietti, M. Shalom, *Angew. Chem. Int. Ed.*, 2015, **54**, 1-6
41. X. Yang, A. Y. Lu, Y. Zhu, S. Min, M. N. Hedhili, Y. Han, K. W. Huang, L. J. Li, *Nanoscale*, 2015, **7**, 10974-10981
